# Supplementary material
Source: PubMed Central journal article supplement (PMC2842979)
Supplement: NIHMS87866-supplement-supplemental_material_Fig_S1-4.pdf [file NIHMS87866-supplement-supplemental_material_Fig_S1-4.pdf]

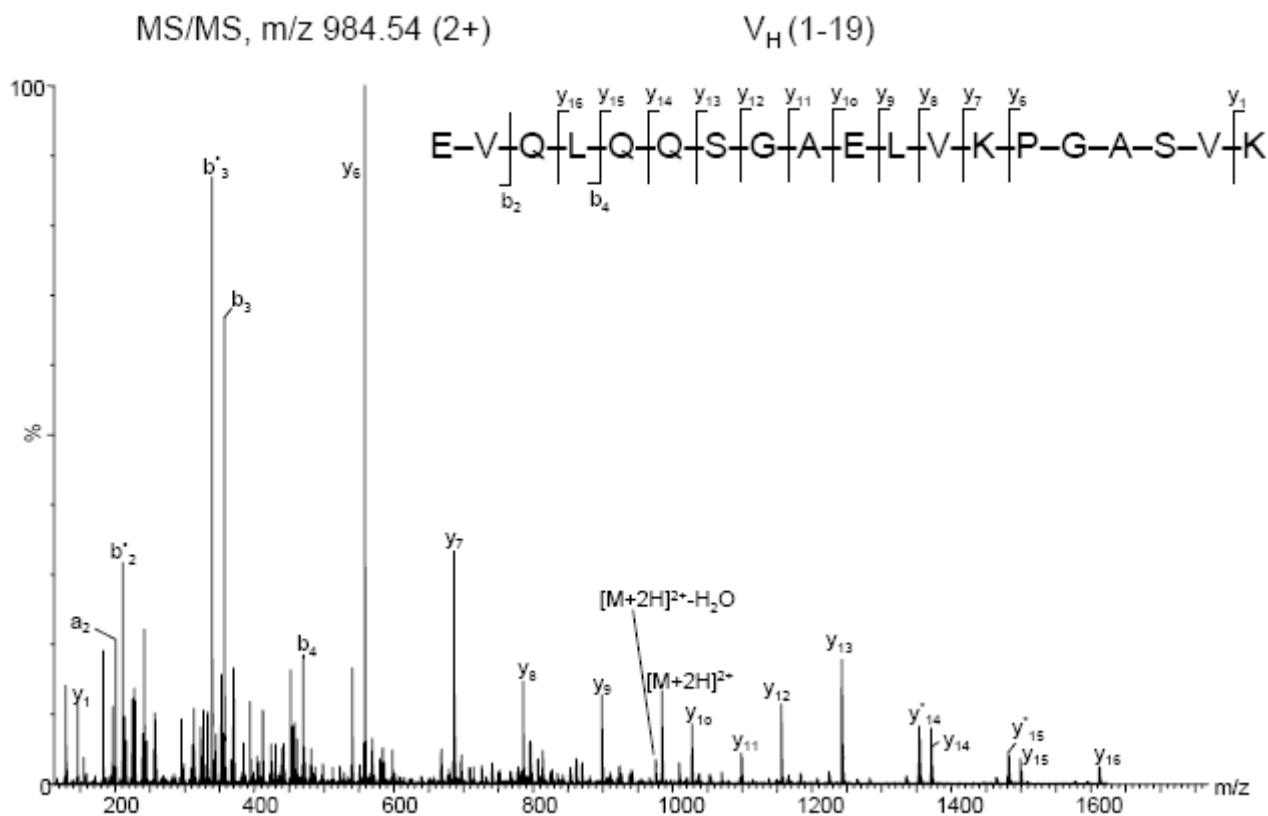

**Fig. S1** Fragment mass spectrum of the precursor ion m/z 984.54 (2+) observed in the heavy chain tryptic digest assigned to the N-terminal peptide V<sub>H</sub>(1-19) indicated at the top (right). The asterisk (\*) denotes loss of ammonia. The empty circle (°) denotes loss of water.

MS/MS, m/z 747.38 (3+)

V<sub>H</sub> (20-38), CDR1

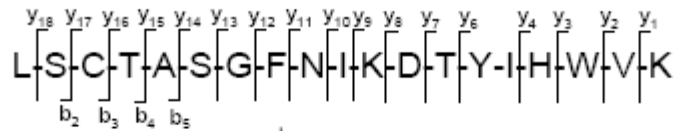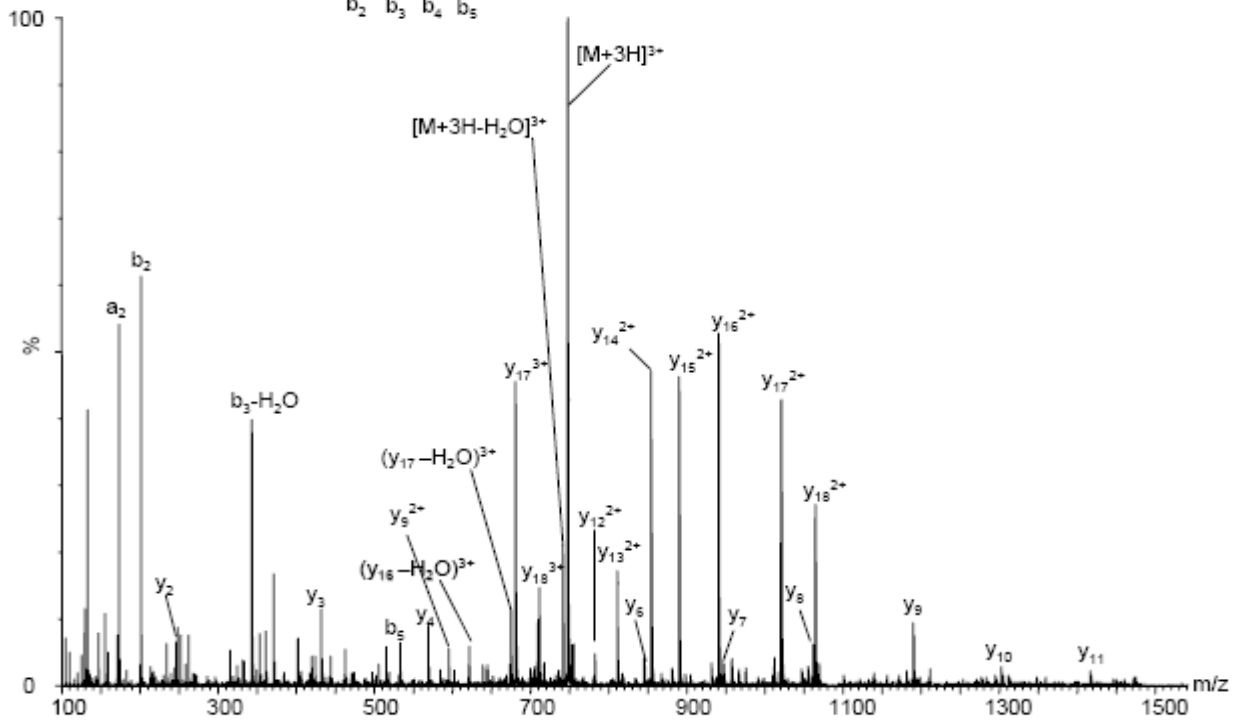

**Fig. S2** Fragment mass spectrum of the precursor ion m/z 747.38 (3+) observed in the heavy chain tryptic digest assigned to the CDR1 peptide V<sub>H</sub>(20-38) indicated at the top (right). The cysteine is alkylated.

MS/MS, m/z 490.26 (3+)

V<sub>H</sub>(39-50)

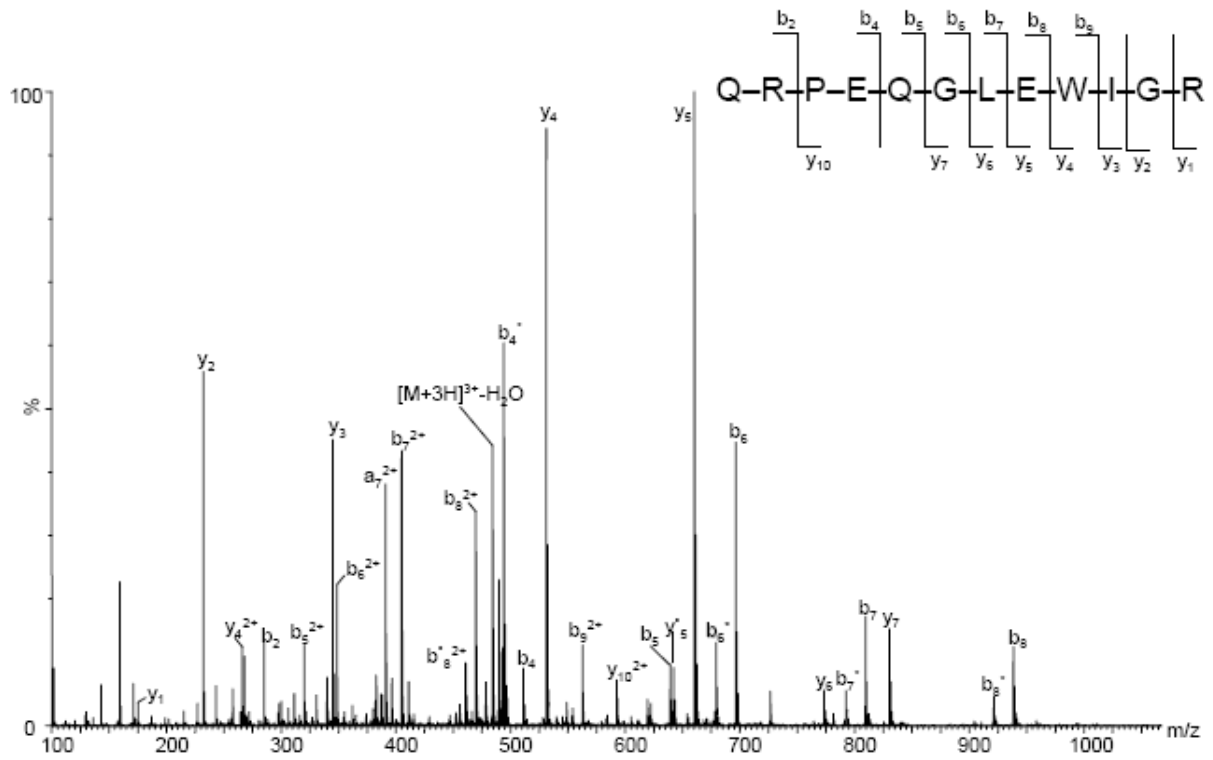

**Fig. S3** Fragment mass spectrum of the precursor ion m/z 490.26 (3+) observed in the heavy chain tryptic digest assigned to the peptide V<sub>H</sub>(39-50) indicated at the top (right). The asterisk (\*) denotes loss of ammonia. The empty circle (°) denotes loss of water.
